# Supplementary material for: Multidimensional characterization of the conical intersection seam in the normal mode space
Source: Chem Sci. 2020 Jun 16;11(26):6856–61. doi: 10.1039/d0sc02045a (PMC7504900; doi:10.1039/d0sc02045a)
Supplement: Supplementary file 1 [file SC-011-D0SC02045A-s001.pdf]

## Supplementary Information

### Multidimensional Characterization of the Conical Intersection Seam in the Normal Mode Space

Heesung Lee, †So-Yeon Kim, and Sang Kyu Kim\*

Department of Chemistry, KAIST, Daejeon 34141, Republic of Korea

\*Corresponding Author: sangkyukim@kaist.ac.kr

Present Addresses: † LG Chem, R&D campus, Daejeon 34122, Republic of Korea

#### Table of Contents

**SI1. SEVI (slow electron velocity map imaging) spectra via selected  $S_1$  vibrations**

**SI1-1. Ionization potentials for thioanisole isotopomers**

**SI1-2. Symmetric ( $\nu_s$ ) and anti-symmetric (7a) S-C stretching vibrations**

**SI1-3. Vibrational mode assignments**

**SI2. Deconvolution of TKER distributions of two thioanisole isotopomers**

**SI2-1. Two-component ( $\tilde{A}$ ,  $\tilde{X}$ ) manual deconvolution**

**SI2-2. Three-component ( $\tilde{A}_1$ ,  $\tilde{A}_2$ ,  $\tilde{X}$ ) gaussian function-aided deconvolution**

**SI3. Sample information (NMR, Chromatography)**

**SI1. SEVI (slow electron velocity map imaging) spectra via selected  $S_1$  vibrations**

## SI1-1. Ionization potentials for thioanisole isotopomers

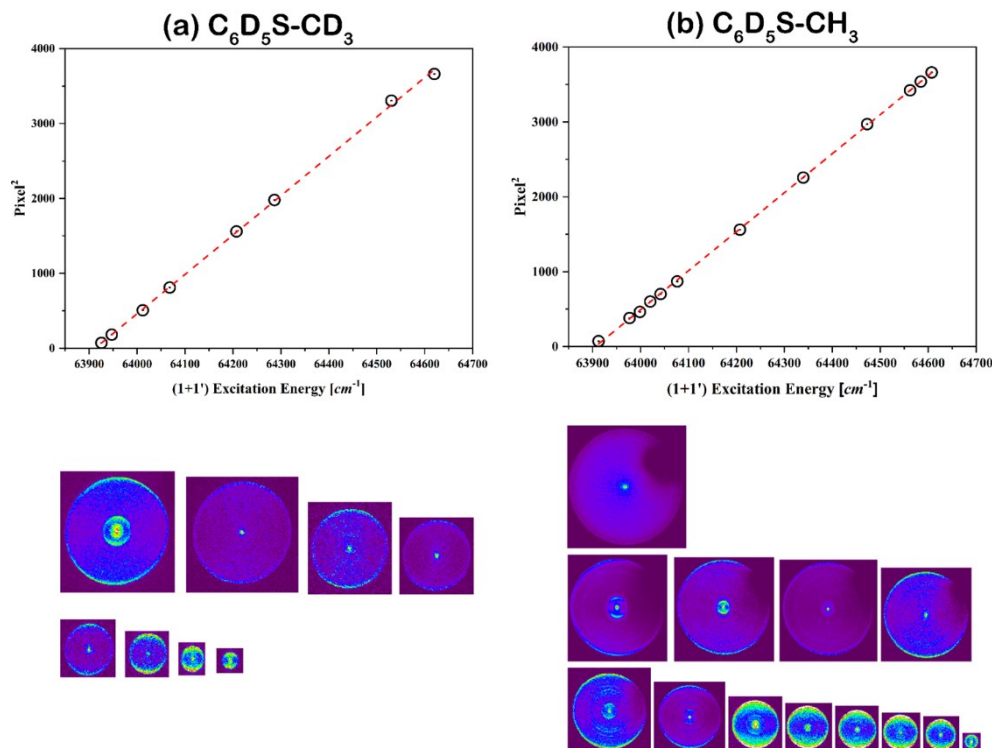

**Figure S1.** Determination of ionization potentials of two thioanisole isotopomers (upper). 2D images (lower) are shown.

For conducting SEVI experiments (Figure S2), two-color threshold-ionization via each  $0_0^0$  transition of two isotopomers was done as Figure S1. Ionization potential of each isotopomer is derived from the extrapolation of the measured radial displacement of the ring in VMI images with respect to the two-photon input energies. Ionization potentials of all six thioanisole isotopomers are summarized in Table S1.

**Table S1.** Experimental  $S_1$  origins, and  $D_0$  origins (ionization potential)

|                          | $^{\dagger}C_6H_5S-CH_3$ | $^{\dagger}C_6H_5S-CD_3$ | $^{\dagger}C_6H_5S-CH_2D_1$ | $^{\dagger}C_6H_5S-CH_1D_2$ | $C_6D_5S-CH_3$ | $C_6D_5S-CD_3$ |
|--------------------------|--------------------------|--------------------------|-----------------------------|-----------------------------|----------------|----------------|
| $S_1$ origin $[cm^{-1}]$ | 34 504                   | 34 516                   | 34 504, 34 510              | 34 510, 34 516              | 34 664         | 34 677         |
| $D_0$ origin $[cm^{-1}]$ | 63 899                   | 63 917                   | 63 904, 63 915              | 63 909, 63 919              | 63 896         | 63 902         |

$^{\dagger}$  Supporting Ref. 1  $^{\ddagger}$  There are two isomers for each partially deuterated Thioanisole- $h_2d_1$  and Thioanisole- $h_1d_2$ , respectively.



## SI1-2. Symmetric ( $\nu_s$ ) and anti-symmetric (7a) S-C stretching vibrations

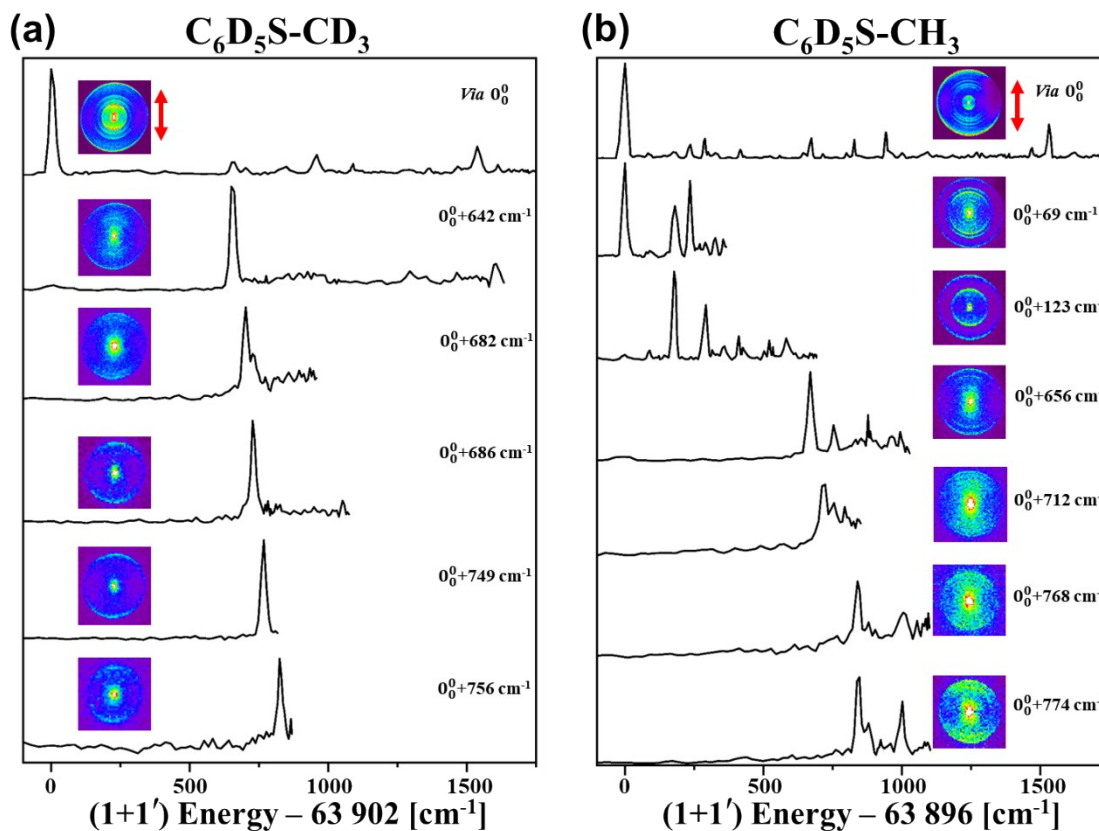

**Figure S2.** 2 color (1+1') SEVI spectra via selected  $S_1$  vibronic states of (a)  $C_6D_5S-CD_3$  and (b)  $C_6D_5S-CH_3$ . Insets show 2D images having comparable ring radius for the peak in each SEVI spectrum whereas the actual reconstruction of images was carried by MEVELER program<sup>S2</sup> and plotted. Linear polarization axis is shown as red arrow.

$S_1 \nu_s$  and 7a modes of two isotopomers are assigned by aids of previous reference values<sup>S3-S6</sup> with SEVI experiments (Figure S2) in this work. Although definitive assignment of the full  $S_1$  normal modes could not be achieved because of limited numbers of SEVI spectra via full  $S_1$  vibronic bands, there are already excellent spectroscopic works for thioanisole molecules.<sup>S3-S6</sup> and authors did reliable assignment for the  $S_1 \nu_s$  and 7a modes for both  $C_6D_5S-CD_3$  and  $C_6D_5S-CH_3$  by getting SEVI spectra. Subsequent comparisons of SEVI peaks ( $D_0-S_1$  peaks) with calculated values (TDDFT) as well as R2PI peaks engenders the reliable assignments keeping in mind the assumption that the vibronic selection rule ( $\Delta\nu = 0$ ) between  $D_0$  and  $S_1$  is obeyed. Detailed numbers are summarized in Table S2.

### SI1-3. Vibrational mode assignments

**Table S2.** Comparison of calculation and experiment. Normal modes are labelled according to the Varsanyi notation.  $S_0$ ,  $D_0$ ,  $S_1$  vibrational energies [ $\text{cm}^{-1}$ ] are calculated using the *Gaussian09* package. The (TD) DFT B3LYP level with 6-311++G(3df,3pd) basis set was used. Assignments are done by comparing previous thioanisole references<sup>S3-S6</sup> with the data of this work (R2PI, TDDFT calculation, and SEVI).

| $\text{C}_6\text{D}_5\text{S-CH}_3$ [ $\text{cm}^{-1}$ ] |       |       |       |      |      | $\text{C}_6\text{D}_5\text{S-CD}_3$ [ $\text{cm}^{-1}$ ] |       |       |       |      |      |
|----------------------------------------------------------|-------|-------|-------|------|------|----------------------------------------------------------|-------|-------|-------|------|------|
| mode                                                     | $S_0$ | $D_0$ | $S_1$ | R2PI | SEVI | mode                                                     | $S_0$ | $D_0$ | $S_1$ | R2PI | SEVI |
| $\tau$                                                   | 48    | 77    | -59   |      | 90   | $\tau$                                                   | 43    | 68    | -55   |      |      |
| 10b                                                      | 159   | 185   | 124   | 123  | 177  | 10b                                                      | 139   | 107   | 80    |      |      |
| 15                                                       | 191   | 199   | 191   |      |      | 15                                                       | 176   | 183   | 176   |      |      |
| $\tau\text{CH}_3$                                        | 228   | 147   | 124   |      |      | $\tau\text{CD}_3$                                        | 186   | 107   | 90    |      |      |
| $\beta_s$                                                | 322   | 326   | 325   |      |      | $\beta_s$                                                | 309   | 313   | 312   |      |      |
| 16a                                                      | 359   | 341   | 485   |      |      | 16a                                                      | 358   | 341   |       |      |      |
| 6a                                                       | 412   | 404   | 410   |      |      | 6a                                                       | 405   | 395   |       |      |      |
| 16b                                                      | 424   | 386   | 427   |      |      | 16b                                                      | 424   | 386   |       |      |      |
| 6b                                                       | 605   | 578   |       |      |      | 6b                                                       | 605   | 578   | 524   |      |      |
| 4                                                        | 553   | 515   |       |      |      | 4                                                        | 553   | 515   | 485   |      |      |
| $\nu_s$                                                  | 670   | 660   | 674   | 656  | 669  | $\nu_s$                                                  | 656   | 642   | 658   | 642  | 651  |
| 7a                                                       | 724   | 689   | 720   | 712  | 711  | 7a                                                       | 691   | 674   | 693   | 682  | 702  |
| 11                                                       |       |       |       |      |      | $\nu_s\tau^1$                                            |       |       | 709   | 686  | 727  |
| 10a                                                      |       |       |       |      |      | 10a                                                      |       |       |       |      |      |
| $\gamma_s\text{CH}_3$                                    | 972   | 924   | 913   |      |      | $\gamma_s\text{CD}_3$                                    | 734   | 700   | 688   |      |      |
| 17b                                                      | 760   | 857   | 623   |      |      | 17b                                                      | 760   | 788   | 623   |      |      |
| 12                                                       | 957   | 955   | 938   |      |      | 12                                                       | 957   | 955   | 937   | 918  |      |
| $\beta_{as}\text{CH}_3$                                  | 984   | 981   | 962   |      |      | $\beta_{as}\text{CD}_3$                                  | 773   | 767   | 764   |      |      |
| 17a                                                      | 803   | 827   |       |      |      | 17a                                                      | 803   | 827   |       |      |      |
| 1                                                        |       |       |       |      |      | 1                                                        |       |       |       |      |      |
| 5                                                        | 827   | 857   |       |      |      | 5                                                        | 827   | 857   |       |      |      |
| 18a                                                      |       |       |       |      |      | 18a                                                      |       |       |       |      |      |
| 18b                                                      |       |       |       |      |      | 18b                                                      |       |       |       |      |      |
| 9b                                                       | 856   | 862   |       |      |      | 9b                                                       | 856   | 862   |       |      |      |
| 9a                                                       | 885   | 896   | 862   |      |      | 9a                                                       | 885   | 896   | 862   |      |      |
| 14                                                       |       |       |       |      |      | 14                                                       |       |       | 834   |      |      |
| $\beta_s\text{CH}_3$                                     | 1358  | 1362  | 1347  |      |      | $\beta_s\text{CD}_3$                                     | 1032  | 1034  | 1025  |      |      |
| 3                                                        |       |       |       |      |      | 3                                                        |       |       |       |      |      |
| $\beta_s\text{CH}_2$                                     | 1486  | 1455  | 1467  |      |      | $\beta_s\text{CD}_2$                                     | 1076  | 1046  | 1056  |      |      |
| 19b                                                      | 842   | 852   | 802   | 768  | 840  | 19b                                                      | 842   | 855   | 804   |      |      |
| $\gamma_{as}\text{CH}_3$                                 | 1469  | 1459  |       |      |      | $\gamma_{as}\text{CD}_3$                                 | 1062  | 1054  | 1049  |      |      |

※ 1→9a, 9b↔14 (assignment change from Supporting Ref. 3,4 to this study)

## SI2. Deconvolution of TKER distributions of two thioanisole isotopomers

### SI2-1. Two-component ( $A, X$ ) manual deconvolution

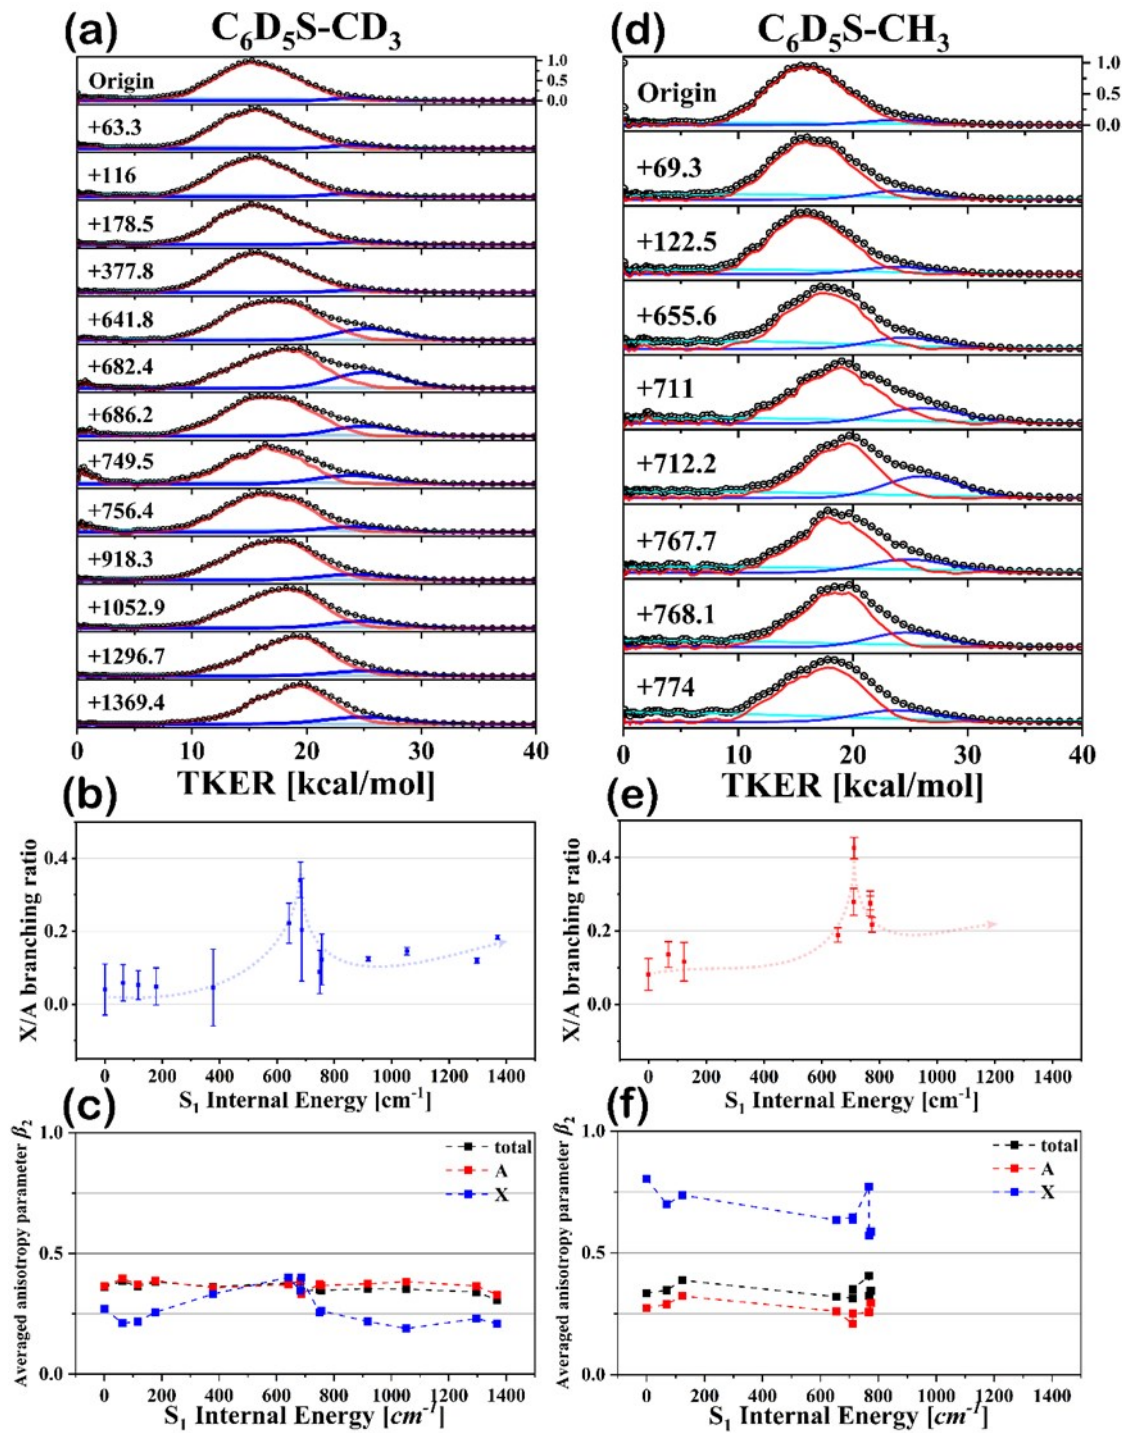

**Figure S3.** (a), (d) full translational energy (total kinetic energy release; TKER) distributions. TKER distributions of (a)  $\text{C}_6\text{D}_5\text{S-CD}_3$  and (d)  $\text{C}_6\text{D}_5\text{S-CH}_3$  via selected  $\text{S}_1$  vibronic transitions followed by fragmentated into (a)  $\cdot\text{CD}_3$  and (d)  $\cdot\text{CH}_3$  detected by (2+1) REMPI via their  $3P_z$  state, respectively. Ordinate: normalized population, black-hollow circle: experiment, red: manually fitted  $\tilde{A}$  component, blue: gaussian fitted  $\tilde{X}$  component, emerald: gaussian fitted two-photon background. Sum of fitted two components ( $\tilde{A}$  and  $\tilde{X}$ ) is drawn in black solid line.  $\tilde{X}/\tilde{A}$  branching ratios of (b)  $\text{C}_6\text{D}_5\text{S-CD}_3$  and (e)  $\text{C}_6\text{D}_5\text{S-CH}_3$  and averaged anisotropy parameters ( $\beta_2$ ) of (c)  $\text{C}_6\text{D}_5\text{S-CD}_3$  and (f)  $\text{C}_6\text{D}_5\text{S-CH}_3$  are shown.

Authors first deconvoluted multiphoton backgrounds from the reconstructed TKER distributions. Considering estimated maximum available TKER for  $\tilde{A}$  and  $\tilde{X}$  products,<sup>S8</sup> most evident  $\tilde{X}$  component in TKER distribution via 7a mode was fitted as a single gaussian function. The rest of that TKER distribution was assumed as  $\tilde{A}$  products. Authors call this as ‘manual deconvolution’. Whereas, to calculate uncertainties, TKER distributions are fitted as a sum of two individual gaussian functions. Error bars for  $\tilde{X}/\tilde{A}$  were then calculated from the  $\pm 1\sigma$  fitting errors of these two Gaussian functions. Based on the above ‘manual’ deconvolution concept, corresponding averaged anisotropy parameters were calculated for two components as well as totally (full range of TKER) averaged anisotropies with respect to the  $\text{S}_1$  internal energy, Figure S3 (c) and (f). Contrast features of  $\tilde{X}$  components of two isotopomers could be recognized. This infers that the  $\text{C}_6\text{D}_5\text{S-CH}_3$  dissociates faster than the  $\text{C}_6\text{D}_5\text{S-CD}_3$  does. Wider vibronic band widths of  $\text{C}_6\text{D}_5\text{S-CH}_3$  than the corresponding narrower widths of  $\text{C}_6\text{D}_5\text{S-CD}_3$  parent R2PI and fragment PHOFEX in Figure 2 strongly support this interpretation.

# SI2-2. Three-component ( $\tilde{A}_1, \tilde{A}_2, \tilde{X}$ ) gaussian function-aided deconvolution

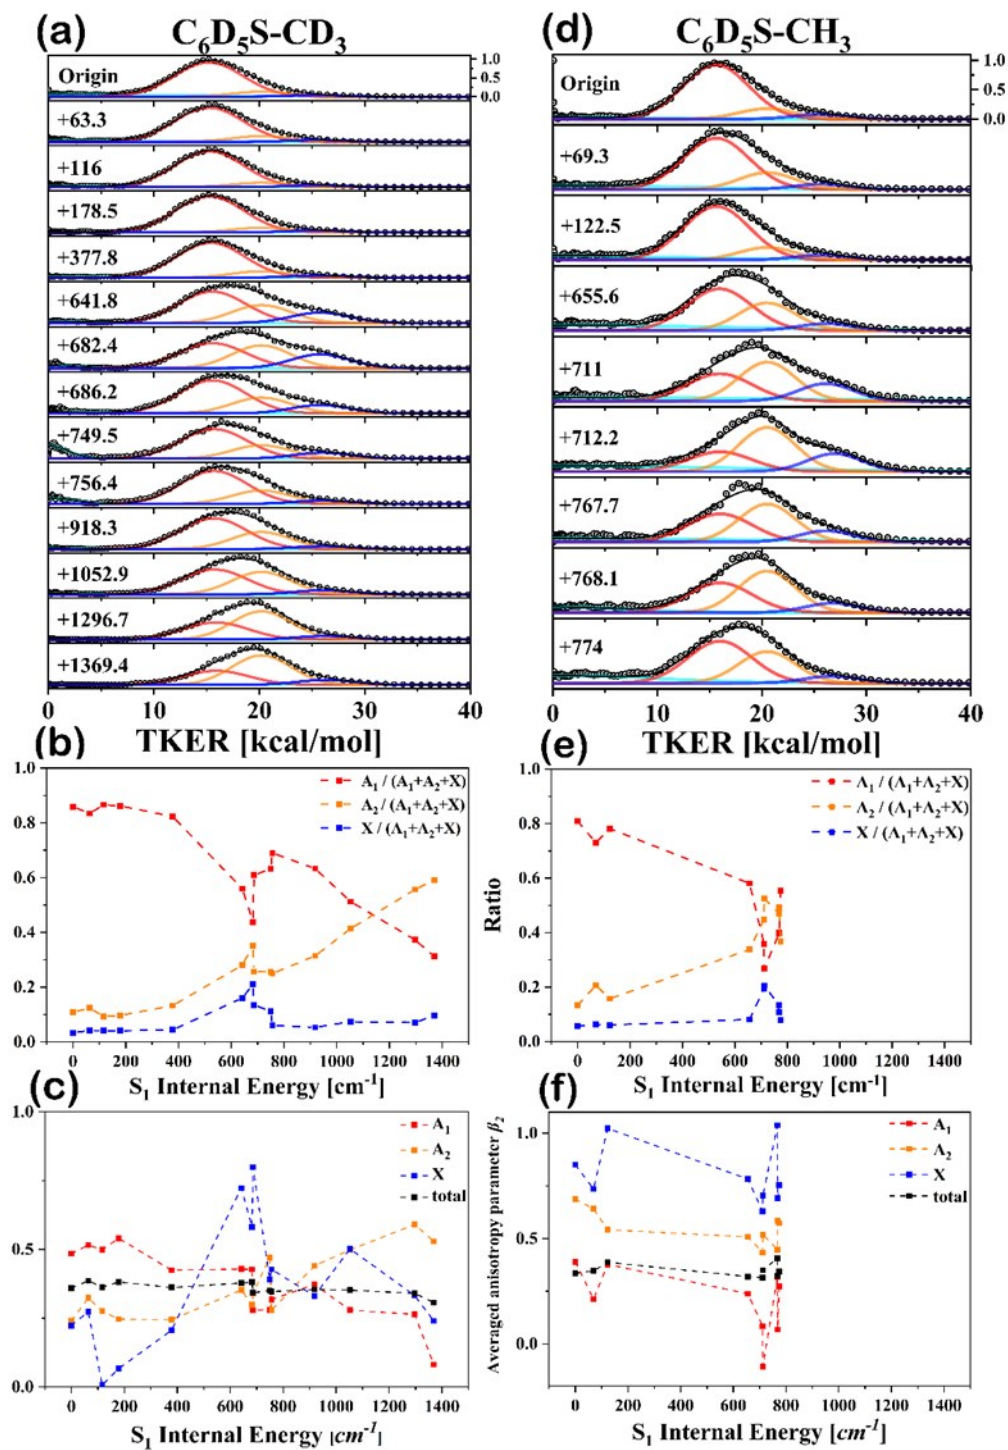

**Figure S4.** (a), (d) full translational energy (total kinetic energy release; TKER) distributions. TKER distributions (upper) of (a)  $C_6D_5S-CD_3$  and (d)  $C_6D_5S-CH_3$  via  $S_1$  vibronic transitions followed by fragmentated into (a)  $\cdot CD_3$  and (d)  $\cdot CH_3$  detected by (2+1) REMPI via their  $3P_z$  state, respectively. Ordinate: normalized population, black-hollow circle: experiment, red: gaussian fitted  $\tilde{A}_1$  component, orange: gaussian fitted  $\tilde{A}_2$  component, blue: gaussian fitted  $X$  component, emerald: two-photon background. Sum of simulated three components ( $\tilde{A}_1$ ,  $\tilde{A}_2$ , and  $X$ ) is drawn in black solid line. Branching ratios of (b)  $C_6D_5S-CD_3$  and (e)  $C_6D_5S-CH_3$  and averaged anisotropy parameters ( $\beta_2$ ) of (c)  $C_6D_5S-CD_3$  and (f)  $C_6D_5S-CH_3$  are shown.

From the previously-reported time-resolved work, it has been found that the bifurcation starting from the  $S_1/S_2$  conical intersection ends up with two distinct reaction pathways. These pathways are very different in terms of its X/A product branching ratio as well as the translational energy distribution of the A state. Although the bifurcation ratio should be linearly proportional to the X/A product branching ratio (as above in (5)), they are quantitatively different. This is because that one channel (vibrational predissociation) gives rise to the A state almost exclusively whereas the other channel (electronic predissociation) produces both A and X products. In the former case of vibrational predissociation, the A state is internally highly excited, giving the low translational energy distribution ( $A_1$ ). On the other hand, the A state from the electronic predissociation is much less excited internally, giving the relatively higher kinetic energy distribution ( $A_2$ ). Based on these experimental facts, the fit to the experiment is given to extract the bifurcation ratios instead of the final product X/A branching ratios. However, since the current experimental results are not time-resolved, the deconvolution is intrinsically ambiguous to give large uncertainties during the fit.

### SI3. Sample information (NMR, Chromatography)

$\text{C}_6\text{D}_5\text{S-CH}_3$

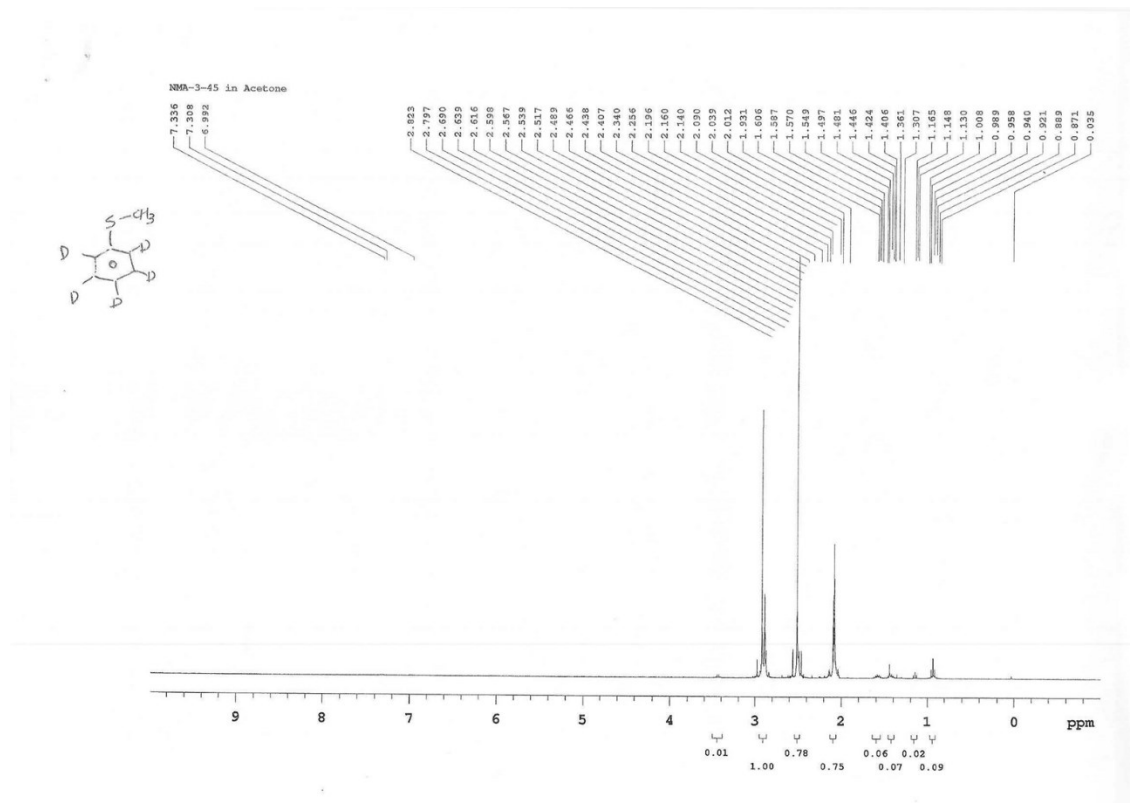

| Chromatogram and Results |                                       |                   |          | MEDIGEN |
|--------------------------|---------------------------------------|-------------------|----------|---------|
| Injection Details        |                                       |                   |          |         |
| Injection Name:          | 2-NMA-3-45                            | Run Time (min):   | 20.00    |         |
| Vial Number:             | 2                                     | Injection Volume: | 20.00    |         |
| Injection Type:          | Unknown                               | Channel:          | UV_VIS_1 |         |
| Calibration Level:       |                                       | Wavelength:       | 254.0    |         |
| Instrument Method:       | ACN100%-20min-0.5                     | Bandwidth:        | n.a.     |         |
| Processing Method:       | ACN100%-20min-1.0                     | Dilution Factor:  | 1.0000   |         |
| Injection Date/Time:     | 11-Oct-16 16:56                       | Sample Weight:    | 1.0000   |         |
| Column type:             | Thermo Acclaim 120 C18 5µ*4.6mm*150mm |                   |          |         |

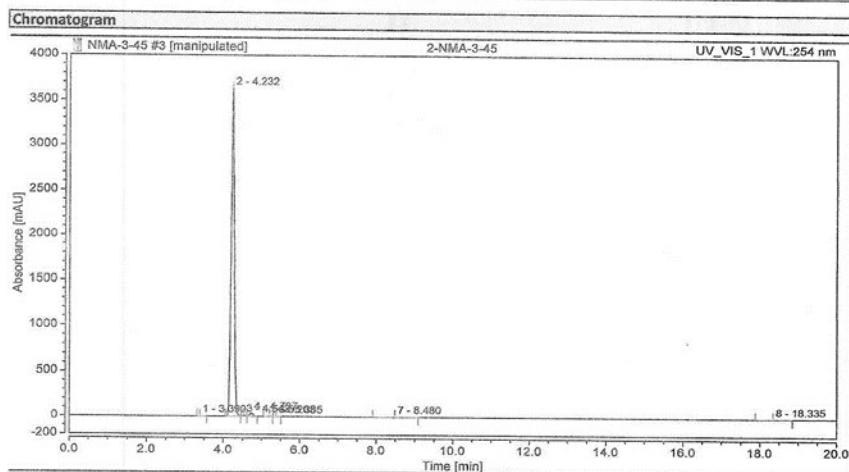

| Integration Results |           |                    |              |            |                 |                   |        |
|---------------------|-----------|--------------------|--------------|------------|-----------------|-------------------|--------|
| No.                 | Peak Name | Retention Time min | Area mAU*min | Height mAU | Relative Area % | Relative Height % | Amount |
| 1                   |           | 3.390              | 0.185        | 2.789      | 0.05            | 0.08              | n.a.   |
| 2                   |           | 4.232              | 338.492      | 3631.141   | 98.50           | 98.68             | n.a.   |
| 3                   |           | 4.542              | 0.541        | 6.858      | 0.16            | 0.19              | n.a.   |
| 4                   |           | 4.737              | 3.443        | 33.598     | 1.00            | 0.91              | n.a.   |
| 5                   |           | 5.205              | 0.264        | 2.638      | 0.08            | 0.07              | n.a.   |
| 6                   |           | 5.385              | 0.122        | 1.218      | 0.04            | 0.03              | n.a.   |
| 7                   |           | 8.480              | 0.278        | 0.681      | 0.08            | 0.02              | n.a.   |
| 8                   |           | 18.335             | 0.324        | 0.866      | 0.09            | 0.02              | n.a.   |
| Total:              |           |                    | 343.620      | 3679.788   | 100.00          | 100.00            |        |

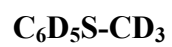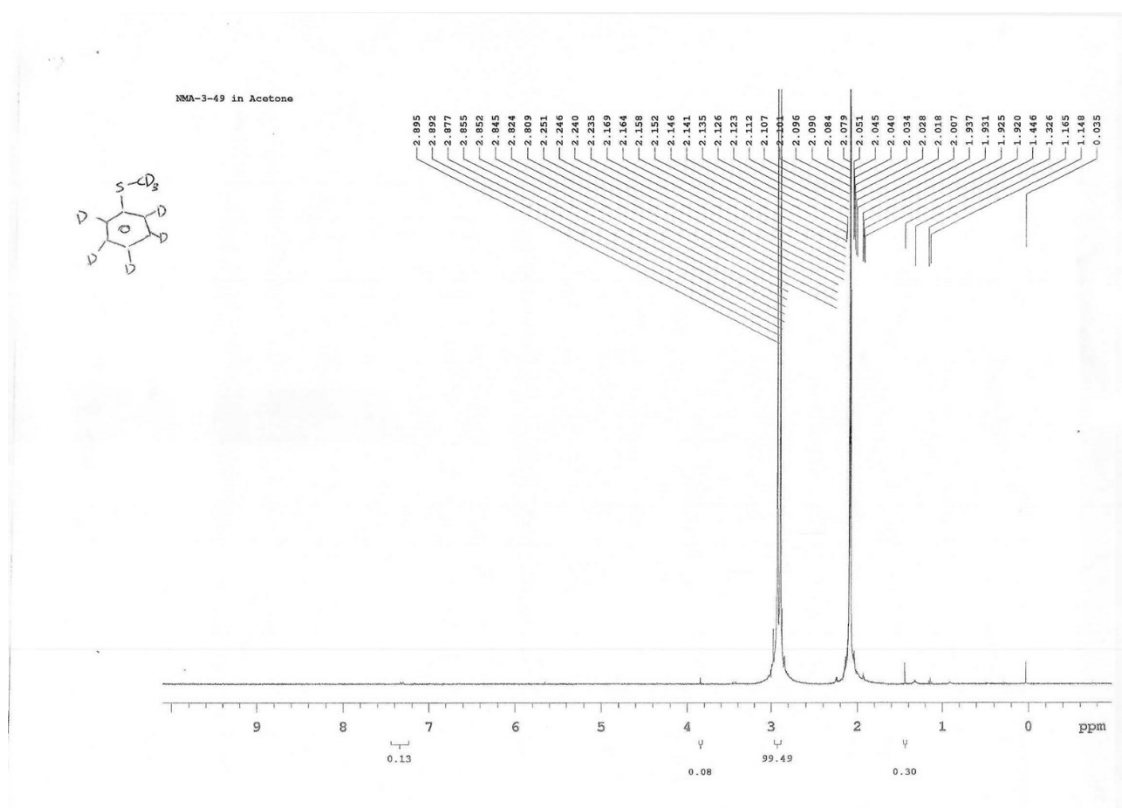

| Chromatogram and Results |                                       |                   |          | MEDIGEN |
|--------------------------|---------------------------------------|-------------------|----------|---------|
| Injection Details        |                                       |                   |          |         |
| Injection Name:          | 2-NMA-3-49-1                          | Run Time (min):   | 20.00    |         |
| Vial Number:             | 2                                     | Injection Volume: | 20.00    |         |
| Injection Type:          | Unknown                               | Channel:          | UV_VIS_1 |         |
| Calibration Level:       |                                       | Wavelength:       | 254.0    |         |
| Instrument Method:       | ACN100%-20min-0.5                     | Bandwidth:        | n.a.     |         |
| Processing Method:       | ACN100%-20min-1.0                     | Dilution Factor:  | 1.0000   |         |
| Injection Date/Time:     | 14-Oct-16 15:59                       | Sample Weight:    | 1.0000   |         |
| Column type:             | Thermo Acclaim 120 C18 5µ*4.6mm*150mm |                   |          |         |

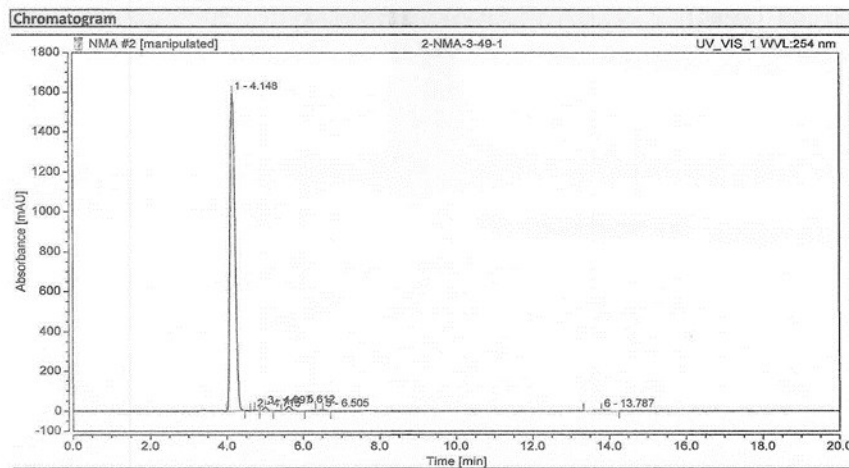

| Integration Results |           |                    |              |            |                 |                   |             |
|---------------------|-----------|--------------------|--------------|------------|-----------------|-------------------|-------------|
| No.                 | Peak Name | Retention Time min | Area mAU*min | Height mAU | Relative Area % | Relative Height % | Amount n.a. |
| 1                   |           | 4.148              | 246.213      | 1593.205   | 97.17           | 96.80             | n.a.        |
| 2                   |           | 4.715              | 0.450        | 4.154      | 0.18            | 0.25              | n.a.        |
| 3                   |           | 4.997              | 2.315        | 19.295     | 0.91            | 1.17              | n.a.        |
| 4                   |           | 5.612              | 3.099        | 22.988     | 1.22            | 1.40              | n.a.        |
| 5                   |           | 6.505              | 0.552        | 3.724      | 0.22            | 0.23              | n.a.        |
| 6                   |           | 13.787             | 0.757        | 2.439      | 0.30            | 0.15              | n.a.        |
| Total:              |           |                    | 253.386      | 1645.805   | 100.00          | 100.00            |             |

## Supplementary References

1. Lee, J.; Kim, S.-Y.; Kim, S. K., Spectroscopic Separation of the Methyl Internal-Rotational Isomers of Thioanisole Isotopomers ( $\text{C}_6\text{H}_5\text{S-CH}_2\text{D}$  and  $\text{C}_6\text{H}_5\text{S-CHD}_2$ ). *The Journal of Physical Chemistry A* **2014**, 118 (10), 1850-1857.
  2. Dick, B., Inverting ion images without Abel inversion: maximum entropy reconstruction of velocity maps. *Phys. Chem. Chem. Phys.* **2014**, 16 (2), 570-580.
  3. Lim, J. S.; Kim, S. K., Experimental probing of conical intersection dynamics in the photodissociation of thioanisole. *Nat. Chem.* **2010**, 2 (8), 627-632.
  4. Lee, J.; Kim, S.-Y.; Kim, S. K., Spectroscopic Separation of the Methyl Internal-Rotational Isomers of Thioanisole Isotopomers ( $\text{C}_6\text{H}_5\text{S-CH}_2\text{D}$  and  $\text{C}_6\text{H}_5\text{S-CHD}_2$ ). *The Journal of Physical Chemistry A* **2014**, 118 (10), 1850-1857.
  5. Han, S.; Lim, J. S.; Yoon, J.-H.; Lee, J.; Kim, S.-Y.; Kim, S. K., Conical intersection seam and bound resonances embedded in continuum observed in the photodissociation of thioanisole-d3. *The Journal of Chemical Physics* **2014**, 140 (5).
  6. Kim, S.-Y.; Lee, J.; Kim, S. K., Conformer specific nonadiabatic reaction dynamics in the photodissociation of partially deuterated thioanisoles ( $\text{C}_6\text{H}_5\text{S-CH}_2\text{D}$  and  $\text{C}_6\text{H}_5\text{S-CHD}_2$ ). *Phys. Chem. Chem. Phys.* **2017**, 19 (29), 18902-18912.
  7. Cederbaum, L. S.; Friedman, R. S.; Ryaboy, V. M.; Moiseyev, N., Conical Intersections and Bound Molecular States Embedded in the Continuum. *Physical Review Letters* **2003**, 90 (1), 013001.
  8. Kim, J. B.; Yacovitch, T. I.; Hock, C.; Neumark, D. M., Slow photoelectron velocity-map imaging spectroscopy of the phenoxide and thiophenoxide anions. *Phys. Chem. Chem. Phys.* **2011**, 13 (38), 17378-17383.
  9. Lim, J. S.; You, H. S.; Kim, S.-Y.; Kim, S. K., Experimental observation of nonadiabatic bifurcation dynamics at resonances in the continuum. *Chemical Science* **2019**, 10 (8), 2404-2412.
  10. G. M. Roberts, D. J. Hadden, L. T. Bergendahl, A. M. Wenge, S. J. Harris, T. N. V. Karsili, M. N. R. Ashfold, M. J. Paterson and V. G. Stavros, *Chemical Science*, **2013**, (4), 993-1001.
-
